# Supplementary material for: Daily Intake of Paraprobiotic Lactobacillus amylovorus CP1563 Improves Pre-Obese Conditions and Affects the Gut Microbial Community in Healthy Pre-Obese Subjects: A Double-Blind, Randomized, Placebo-Controlled Study
Source: PubMed Central journal article supplement (PMC7074956; doi:10.3390/microorganisms8020304), 2020-02-22
Supplement: microorganisms-08-00304-s001.pdf [file microorganisms-08-00304-s001.pdf]

**Table S1.** Abdominal fat areas and anthropometric parameters.

| Parameters                                         | Treatment                    | Values      |             |             |             |
|----------------------------------------------------|------------------------------|-------------|-------------|-------------|-------------|
|                                                    |                              | 0 weeks     | 4 weeks     | 8 weeks     | 12 weeks    |
| Abdominal total fat area (cm <sup>2</sup> )        | CP1563-10-HOA                | 335.0 ± 6.7 | 339.7 ± 7.1 | 335.4 ± 7.2 | 332.0 ± 7.3 |
|                                                    | Placebo                      | 340.1 ± 6.3 | 345.6 ± 6.9 | 346.1 ± 6.9 | 349.6 ± 7.0 |
|                                                    | <i>p</i> value (vs. placebo) | 0.58        | 0.55        | 0.29        | 0.08        |
| Abdominal visceral fat area (cm <sup>2</sup> )     | CP1563-10-HOA                | 92.0 ± 3.5  | 93.1 ± 3.5  | 89.2 ± 3.2  | 88.8 ± 3.4  |
|                                                    | Placebo                      | 90.8 ± 3.7  | 90.3 ± 3.4  | 89.6 ± 3.5  | 92.4 ± 3.8  |
|                                                    | <i>p</i> value (vs. placebo) | 0.81        | 0.55        | 0.92        | 0.49        |
| Abdominal subcutaneous fat area (cm <sup>2</sup> ) | CP1563-10-HOA                | 242.9 ± 6.5 | 246.5 ± 6.6 | 246.2 ± 6.7 | 243.1 ± 6.6 |
|                                                    | Placebo                      | 249.3 ± 6.4 | 255.3 ± 6.8 | 256.4 ± 6.9 | 257.2 ± 6.8 |
|                                                    | <i>p</i> value (vs. placebo) | 0.48        | 0.35        | 0.29        | 0.14        |
| Body weight (kg)                                   | CP1563-10-HOA                | 72.5 ± 0.9  | 72.5 ± 0.9  | 72.4 ± 0.9  | 72.3 ± 1.0  |
|                                                    | Placebo                      | 74.5 ± 1.0  | 74.8 ± 1.0  | 75.0 ± 1.0  | 75.1 ± 1.0  |
|                                                    | <i>p</i> value (vs. placebo) | 0.14        | 0.097       | 0.06        | 0.045       |
| BMI (kg/m <sup>2</sup> )                           | CP1563-10-HOA                | 27.0 ± 0.2  | 27.1 ± 0.2  | 27.0 ± 0.2  | 26.9 ± 0.2  |
|                                                    | Placebo                      | 27.1 ± 0.2  | 27.2 ± 0.2  | 27.3 ± 0.2  | 27.3 ± 0.2  |
|                                                    | <i>p</i> value (vs. placebo) | 0.86        | 0.58        | 0.26        | 0.18        |
| Body fat percentage (%)                            | CP1563-10-HOA                | 34.2 ± 0.7  | 34.4 ± 0.8  | 34.6 ± 0.8  | 34.3 ± 0.7  |
|                                                    | Placebo                      | 33.9 ± 0.7  | 34.0 ± 0.8  | 34.0 ± 0.8  | 34.1 ± 0.8  |
|                                                    | <i>p</i> value (vs. placebo) | 0.79        | 0.67        | 0.57        | 0.81        |
| Waist circumference (cm)                           | CP1563-10-HOA                | 91.1 ± 0.7  | 91.4 ± 0.7  | 91.8 ± 0.6  | 92.2 ± 0.6  |
|                                                    | Placebo                      | 91.4 ± 0.7  | 91.8 ± 0.7  | 92.2 ± 0.7  | 92.6 ± 0.7  |
|                                                    | <i>p</i> value (vs. placebo) | 0.74        | 0.61        | 0.69        | 0.64        |

Values are the mean ± SEM. The *p* value was calculated by Student's *t*-test.

**Table S2.** The  $\alpha$ -diversity indices.

|                 | CP1563-10-HOA     | Placebo           | <i>p</i> value (vs. placebo) |
|-----------------|-------------------|-------------------|------------------------------|
| <b>0 weeks</b>  |                   |                   |                              |
| Chao1           | 1089.7 $\pm$ 35.8 | 1081.9 $\pm$ 35.5 | 0.88                         |
| Shannon         | 5.9 $\pm$ 0.1     | 5.8 $\pm$ 0.1     | 0.43                         |
| PD whole tree   | 27.7 $\pm$ 0.9    | 27.0 $\pm$ 0.8    | 0.55                         |
| <b>12 weeks</b> |                   |                   |                              |
| Chao1           | 1267.7 $\pm$ 44.1 | 1349.0 $\pm$ 42.5 | 0.19                         |
| Shannon         | 6.2 $\pm$ 0.1     | 6.1 $\pm$ 0.1     | 0.85                         |
| PD whole tree   | 31.4 $\pm$ 1.0    | 32.3 $\pm$ 0.9    | 0.49                         |

Values are the mean  $\pm$  SEM (the CP1563-10-HOA group at 0 weeks: n=83, at 12 weeks: n=82; the placebo group at 0 weeks: n=84, at 12 weeks: n=83). The *p* values were calculated by Student's *t*-test.

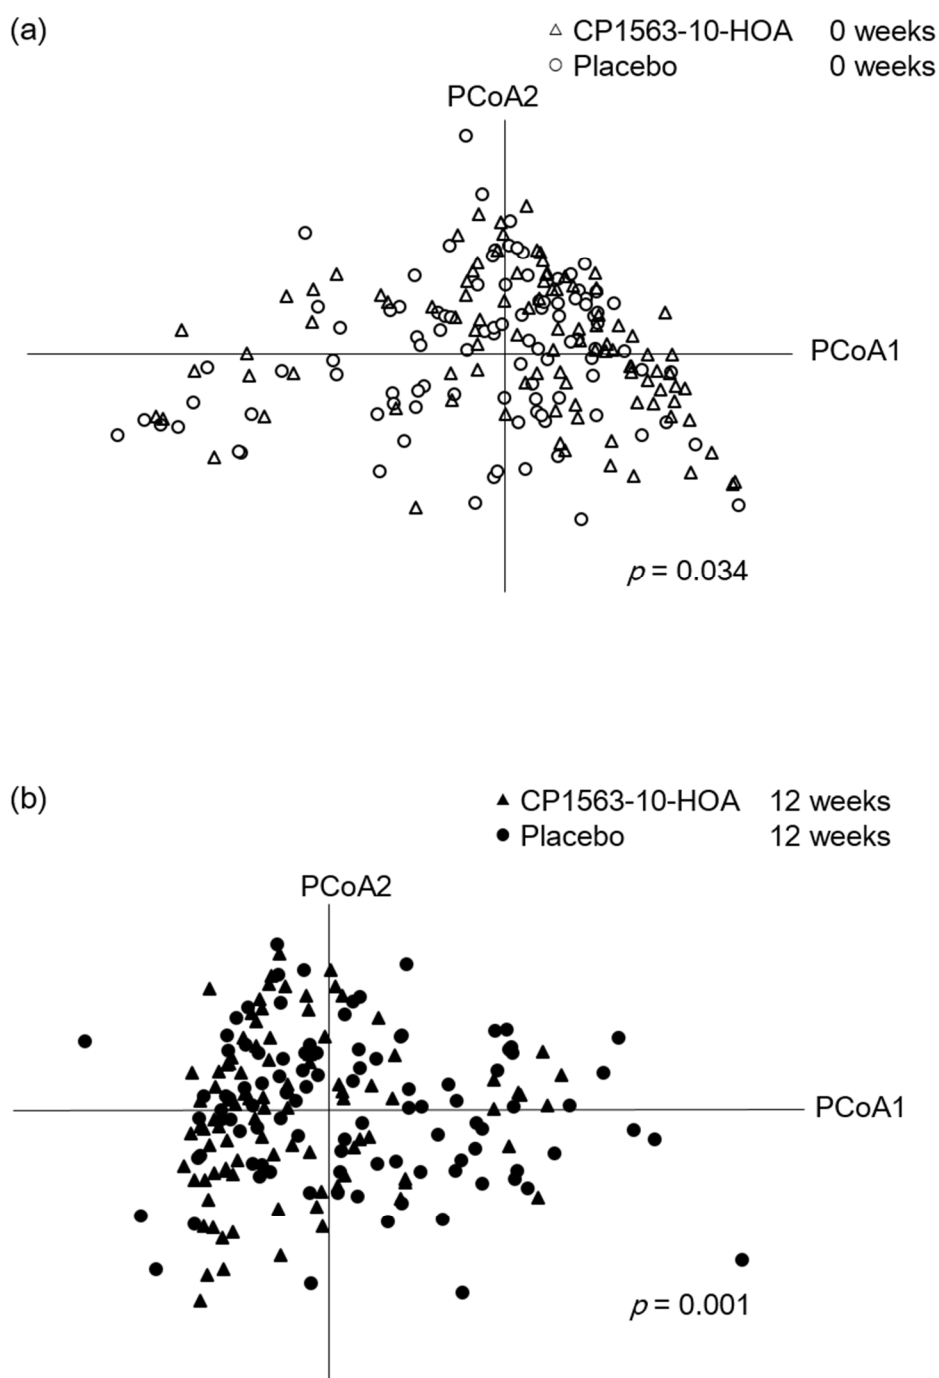

**Figure S1.** Plots of the placebo and CP1563-10-HOA groups at 0 (a) and 12 (b) weeks were visualized by principal coordinate analysis (PCoA) based on the weighted UniFrac distance (the CP1563-10-HOA group at 0 weeks:  $n=83$ , at 12 weeks:  $n=82$ ; the placebo group at 0 weeks:  $n=84$ , at 12 weeks:  $n=83$ ). The  $p$  values were calculated by permutational MANOVA based on the weighted UniFrac distance.

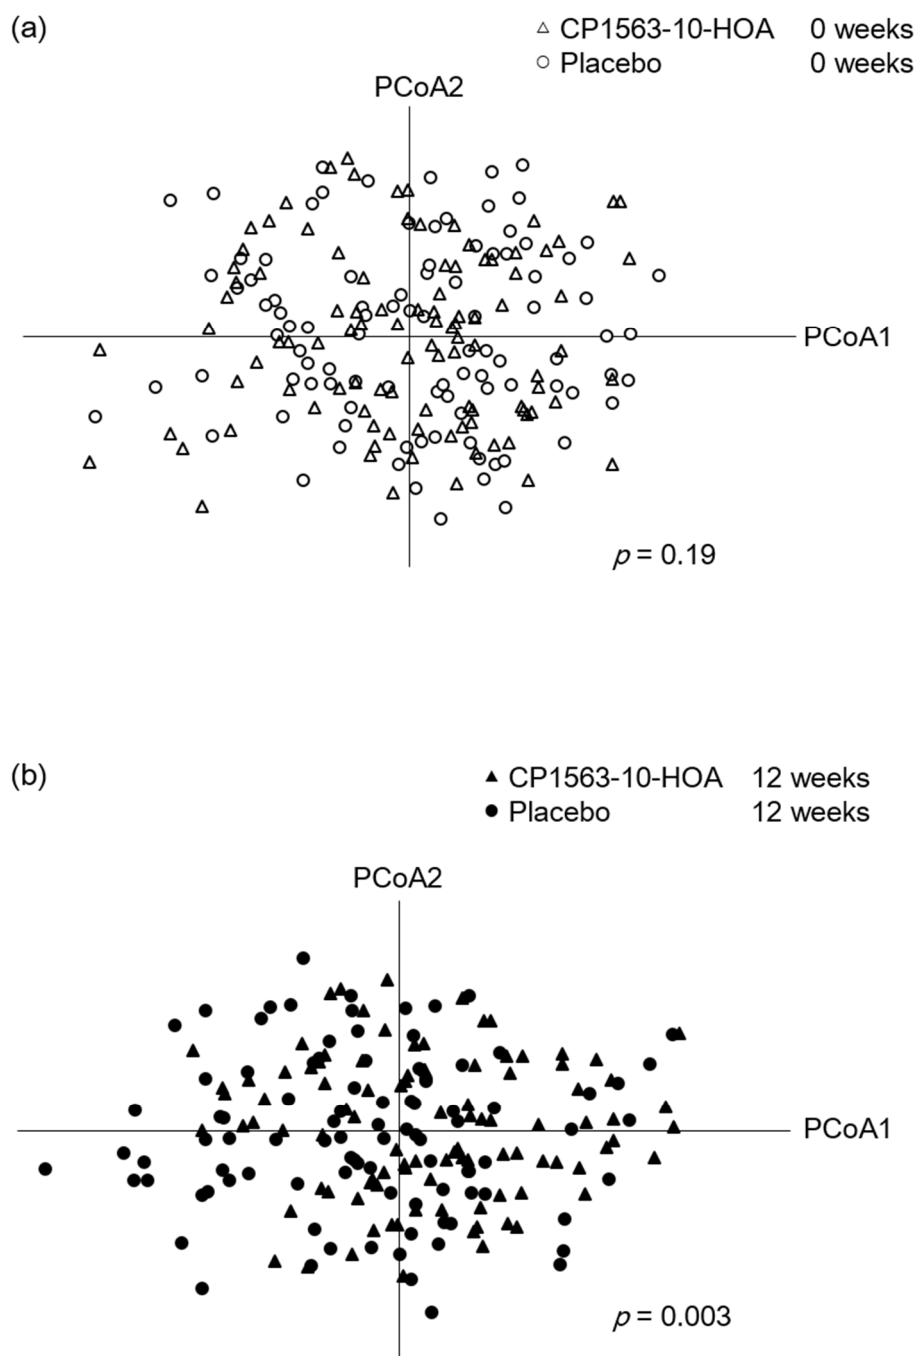

**Figure S2.** Plots of the placebo and CP1563-10-HOA groups at 0 (a) and 12 (b) weeks were visualized by principal coordinate analysis (PCoA) based on the unweighted UniFrac distance (the CP1563-10-HOA group at 0 weeks:  $n=83$ , at 12 weeks:  $n=82$ ; the placebo group at 0 weeks:  $n=84$ , at 12 weeks:  $n=83$ ). The  $p$  values were calculated by permutational MANOVA based on the unweighted UniFrac distance.

**Table S3.** Components of the fecal microbiota at the genus level.

| Genus                                                | Composition (%) |
|------------------------------------------------------|-----------------|
| <i>Blautia</i>                                       | 19.5 ± 0.5      |
| <i>Bifidobacterium</i>                               | 10.3 ± 0.6      |
| <i>Faecalibacterium</i>                              | 10.7 ± 0.5      |
| <i>Coprococcus</i>                                   | 9.1 ± 0.3       |
| <i>Lachnospiraceae</i> ;g_[ <i>Ruminococcus</i> ]    | 6.3 ± 0.3       |
| <i>Lachnospiraceae</i> ;g                            | 5.7 ± 0.2       |
| <i>Roseburia</i>                                     | 5.8 ± 0.4       |
| <i>Bacteroides</i>                                   | 5.5 ± 0.4       |
| <i>Streptococcus</i>                                 | 2.6 ± 0.2       |
| <i>Ruminococcus</i>                                  | 2.6 ± 0.2       |
| <i>Dorea</i>                                         | 2.2 ± 0.1       |
| <i>Erysipelotrichaceae</i> ;g_[ <i>Eubacterium</i> ] | 1.3 ± 0.2       |
| <i>Lachnospiraceae</i> ; Other                       | 1.3 ± 0.1       |
| <i>Butyricoccus</i>                                  | 1.1 ± 0.1       |
| <i>Collinsella</i>                                   | 1.1 ± 0.1       |

Values are the mean ± SEM (n=332).

**Table S4.** Summary of the characteristics of subjects and gut microbial composition of this study at week 0 and other studies.

|                                                      | CP1563-10-HOA | Placebo    | Nishijima et al. [1] | Hisada et al. [2] | Oki et al. [3] |
|------------------------------------------------------|---------------|------------|----------------------|-------------------|----------------|
| BMI (kg/m <sup>2</sup> )                             | 27            | 27         | 22                   | 25                | 22             |
| Age (years)                                          | 44            | 42         | 32                   | 38                | 52             |
| <b>Genus (%)</b>                                     |               |            |                      |                   |                |
| <i>Blautia</i>                                       | 21.9 ± 1.2    | 18.4 ± 1.0 | 16.7                 | 14.8              | 4.4            |
| <i>Bifidobacterium</i>                               | 8.0 ± 1.1     | 11.8 ± 1.4 | 17.9                 | 4.6               | 2.8            |
| <i>Faecalibacterium</i>                              | 10.9 ± 1.0    | 9.4 ± 0.7  | 5.8                  | 5.3               | 7.5            |
| <i>Coprococcus</i>                                   | 9.5 ± 0.8     | 9.9 ± 0.8  | 1.4                  | 1.4               | 2.2            |
| <i>Lachnospiraceae</i> ;g_[ <i>Ruminococcus</i> ]    | 6.5 ± 0.6     | 7.0 ± 0.7  | -                    | -                 | 0.4            |
| <i>Lachnospiraceae</i> ;g                            | 4.7 ± 0.4     | 6.5 ± 0.5  | -                    | -                 | 0.4            |
| <i>Roseburia</i>                                     | 5.7 ± 0.7     | 6.2 ± 0.8  | 2.2                  | 1                 | 1.2            |
| <i>Bacteroides</i>                                   | 5.8 ± 0.6     | 3.3 ± 0.5  | 11.4                 | 17.7              | 28.2           |
| <i>Streptococcus</i>                                 | 3.0 ± 0.5     | 2.4 ± 0.5  | 2.2                  | 2.5               | 1.1            |
| <i>Ruminococcus</i>                                  | 2.3 ± 0.3     | 2.8 ± 0.4  | 5.6                  | 7.1               | 3.3            |
| <i>Dorea</i>                                         | 2.3 ± 0.3     | 2.3 ± 0.2  | 2.1                  | 1.4               | 0.7            |
| <i>Erysipelotrichaceae</i> ;g_[ <i>Eubacterium</i> ] | 1.6 ± 0.4     | 1.1 ± 0.3  | -                    | -                 | 0.6            |
| <i>Lachnospiraceae</i> ; Other                       | 1.2 ± 0.2     | 1.3 ± 0.1  | -                    | -                 | 6.5            |
| <i>Butyrivicoccus</i>                                | 1.1 ± 0.1     | 1.3 ± 0.1  | -                    | -                 | 0.01           |
| <i>Collinsella</i>                                   | 1.0 ± 0.1     | 1.3 ± 0.2  | 3.0                  | 2.7               | 0.6            |

Values of characteristics of subjects are the mean. Values of gut microbial composition are the mean ± SEM (this study) or the mean (other studies).

## References

1. Nishijima, S.; Suda, W.; Oshima, K.; Kim, S.W.; Hirose, Y.; Morita, H.; Hattori, M. The gut microbiome of healthy Japanese and its microbial and functional uniqueness. *DNA Res.* **2016**, *23*, 125-133, doi:10.1093/dnares/dsw002.
2. Hisada, T.; Endoh, K.; Kuriki, K. Inter- and intra-individual variations in seasonal and daily stabilities of the human gut microbiota in Japanese. *Arch. Microbiol.* **2015**, *197*, 919-934, doi:10.1007/s00203-015-1125-0.
3. Oki, K.; Toyama, M.; Banno, T.; Chonan, O.; Benno, Y.; Watanabe, K. Comprehensive analysis of the fecal microbiota of healthy Japanese adults reveals a new bacterial lineage associated with a phenotype characterized by a high frequency of bowel movements and a lean body type. *BMC Microbiol.* **2016**, *16*, 284, doi:10.1186/s12866-016-0898-x.
